# Supplementary figures and images for: Oncogenic Src requires a wild-type counterpart to regulate invadopodia maturation
Source: Oxford University Press journal article supplement (doi:10.1242/jcs.075200), 2010-10-28

Binding intensity

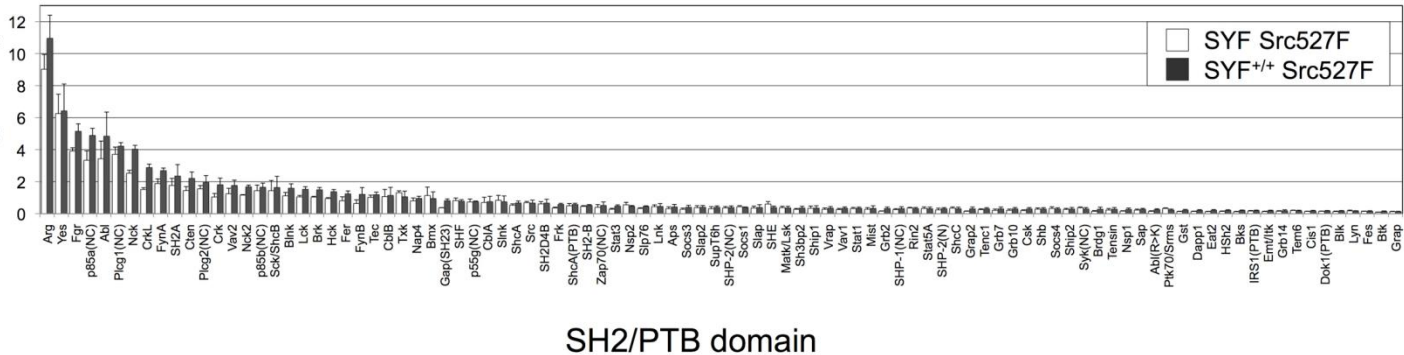

Supplement: jcs075200figs6.pdf [file jcs075200figs6.pdf]
